# Supplementary material for: Neoadjuvant Gamma Knife Surgery for Metastatic Brain Tumor: Clinical Use and Impact on Leptomeningeal Seeding
Source: Research Square preprint supplement (doi:10.21203/rs.3.rs-7977372/v1), 2025-11-11
Supplement: Supplementary file 1 [file 332b8ca52345a9c435db538b.docx]

**Supplementary Table.** Patient demographics after propensity score matching (Origin of cancer, preoperative KPS, Extracranial metastasis)

|  | Adjuvant GKS | Neoadjuvant GKS | p |
| --- | --- | --- | --- |
| (N=50) | (N=50) |
| Sex |  |  | 0.671 |
| Female | 15 (30.0%) | 18 (36.0%) |  |
| Male | 35 (70.0%) | 32 (64.0%) |  |
| Age (yrs) | 56.9 ± 9.6 | 57.0 ± 13.5 | 0.966 |
| Origin cancer |  | | 0.523 |
| Breast cancer | 3 ( 6.0%) | 3 ( 6.0%) |
| GI cancer | 7 (14.0%) | 6 (12.0%) |
| Hepatocellular carcinoma | 2 ( 4.0%) | 3 ( 6.0%) |
| Lung cancer | 28 (56.0%) | 19 (38.0%) |
| Melanoma | 3 ( 6.0%) | 8 (16.0%) |
| Ovarian cancer | 2 ( 4.0%) | 3 ( 6.0%) |
| Renal cell carcinoma | 5 (10.0%) | 8 (16.0%) |
| Preoperative Chemotherapy |  | | 0.230 |
| No | 28 (56.0%) | 21 (42.0%) |
| Yes | 22 (44.0%) | 29 (58.0%) |
| Preoperative target therapy |  | | 1.000 |
| No | 45 (90.0%) | 45 (90.0%) |
| Yes | 5 (10.0%) | 5 (10.0%) |
| Preoperative immunotherapy |  | | 1.000 |
| No | 48 (96.0%) | 47 (94.0%) |
| Yes | 2 ( 4.0%) | 3 ( 6.0%) |
| Preoperative KPS |  | | 0.082 |
| <70 | 6 (12.0%) | 5 (10.0%) |
| 70-80 | 35 (70.0%) | 26 (52.0%) |
| 90-100 | 9 (18.0%) | 19 (38.0%) |
| Extracranial metastasis |  | | 0.314 |
| No | 25 (50.0%) | 19 (38.0%) |
| Yes | 25 (50.0%) | 31 (62.0%) |
| Number of BM |  | | 0.480 |
| n=1 | 21 (42.0%) | 27 (54.0%) |
| n=2-3 | 17 (34.0%) | 14 (28.0%) |
| n>3 | 12 (24.0%) | 9 (18.0%) |
| Adjuvant chemotherapy |  | | 0.027* |
| No | 21 (42.0%) | 33 (66.0%) |
| Yes | 29 (58.0%) | 17 (34.0%) |
| Adjuvant target therapy |  | | 0.387 |
| No | 45 (90.0%) | 41 (82.0%) |
| Yes | 5 (10.0%) | 9 (18.0%) |
| Adjuvant immunotherapy |  | | 0.241 |
| No | 50 (100.0%) | 47 (94.0%) |
| Yes | 0 ( 0.0%) | 3 ( 6.0%) |

GKS: Gamma knife surgery; GI: gastrointestinal; KPS: Karnofsky performance score; BM: brain metastasis.
